# Supplementary material for: Mitochondrial Lon is over-expressed in high-grade gliomas, and mediates hypoxic adaptation: potential role of Lon as a therapeutic target in glioma
Source: PubMed Central journal article supplement (PMC5340227; doi:10.18632/oncotarget.12681), 2016-10-15
Supplement: oncotarget-07-77457-s001.pdf [file oncotarget-07-77457-s001.pdf]

## Mitochondrial Lon is over-expressed in high-grade gliomas, and mediates hypoxic adaptation: potential role of Lon as a therapeutic target in glioma

### SUPPLEMENTARY FIGURES

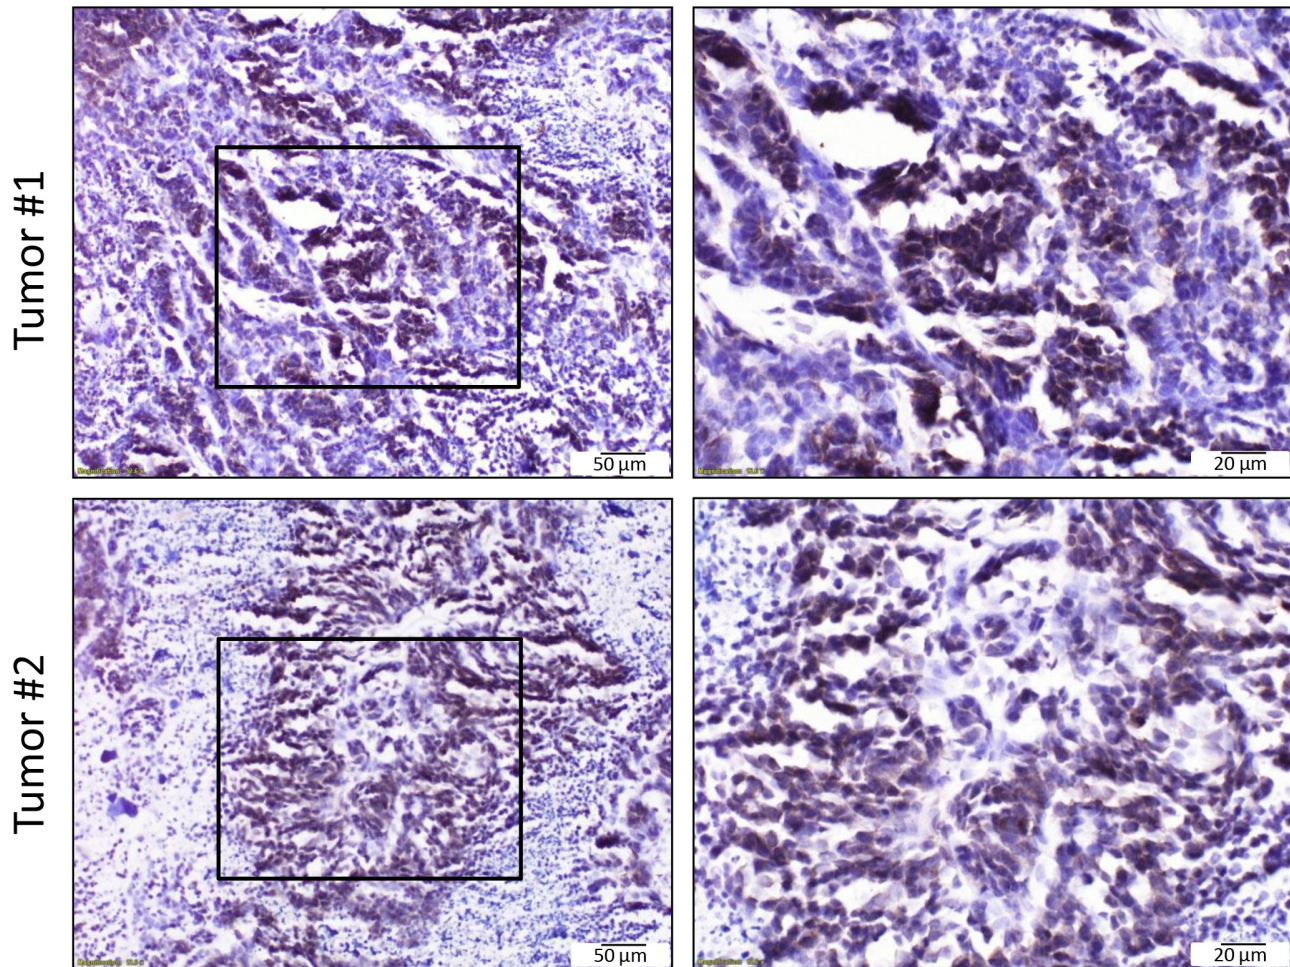

**Supplementary Figure S1: Representative immunostaining of Lon in D-54 MG xenografts.** D-54 xenografts were subcutaneously injected into nude mice anterior to their thighs. Lon staining was performed using paraffin-embedded sections from tumor mass of xenografts. Microscopic magnification was x200 (left) and x400 (right).

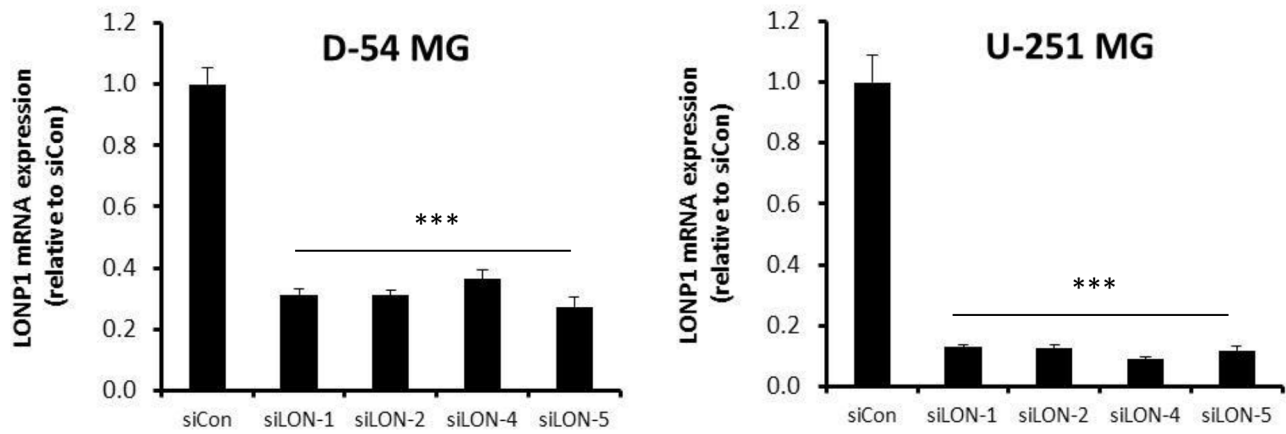

**Supplementary Figure S2: Successful knockdown of *LONP1* mRNA expression in glioma cells.** Four human FlexiTube *siRNAs* targeting *LONP1* and negative control *siRNA* were transfected into cells for 48 hours.
